# Supplementary material for: Catalytic evaluation of microwave-assisted copper cobaltite oxide (CuCo2O4) for propane oxidation
Source: Royal Society of Chemistry journal article supplement (doi:10.1039/d4dt02828g), 2024-12-11
Supplement: d4dt02828g1.pdf [file d4dt02828g1.pdf]

Supplementary Information:

## Catalytic Evaluation of Microwave-Assisted Copper Cobaltite oxide ( $\text{CuCo}_2\text{O}_4$ ) for Propane Oxidation

Nidia Guadalupe García-Peña<sup>1,2</sup>, Rocío Redón<sup>3</sup>, Juan Ivan Gomez-Peralta<sup>4</sup>, David Díaz<sup>1</sup>, Xim Bohkimi<sup>5</sup>, Lucy-Caterine Daza-Gómez<sup>6\*</sup>

<sup>1</sup>Facultad de Química, Universidad Nacional Autónoma de México, Ciudad de México, 04510, Mexico

<sup>2</sup>Departamento de Física Aplicada, CINVESTAV-IPN, Antigua Carretera a Progreso km 6, A.P. 37, Mérida 97310, México

<sup>3</sup>Instituto de Ciencias Aplicadas y Tecnología, Universidad Nacional Autónoma de México, Cd. Universitaria, C.P. 04510, Coyoacán, Ciudad de México, México

<sup>4</sup>Laboratorio Nacional de Nano y Biomateriales, Antigua Carretera a Progreso km 6, A.P. 37, Mérida 97310, México

<sup>5</sup>Instituto de Física, Universidad Nacional Autónoma de México, A.P. 20-364, México City 01000, Mexico

<sup>6</sup>División de Ingeniería Mecánica e Industrial, Facultad de Ingeniería, Universidad Nacional Autónoma de México, Ciudad de México, México

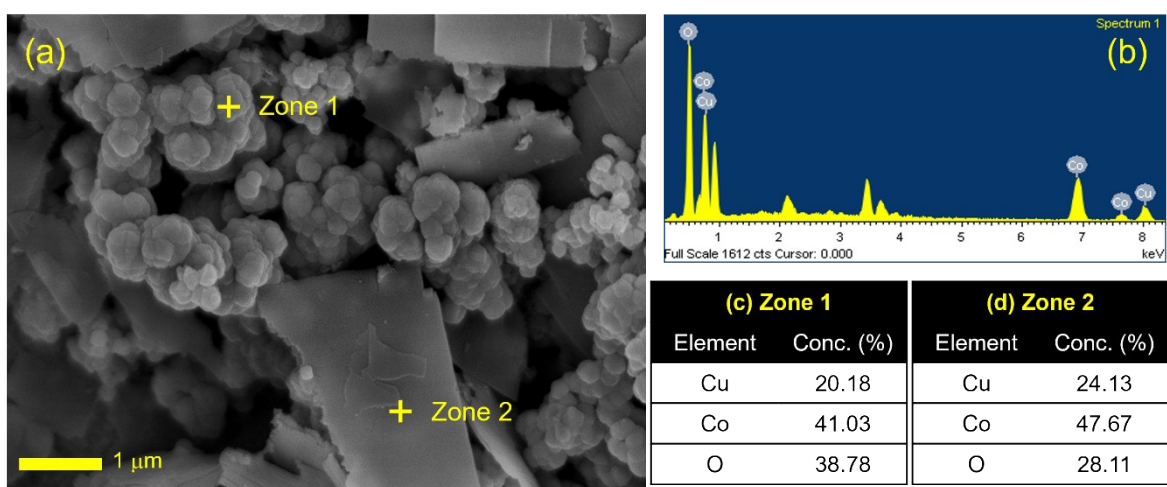

**Figure S.1.** EDS analyses on a sample of CoP. Two zones from the micrograph (a) were analyzed. As a result, spectra as the one shown in (b) were obtained. The resulting semiquantitative concentrations for both regions were calculated, which showed concentrations near the theoretical concentrations for Co and Cu in  $\text{CuCo}_2\text{O}_4$  compound (25.9% and 48.3%, respectively).

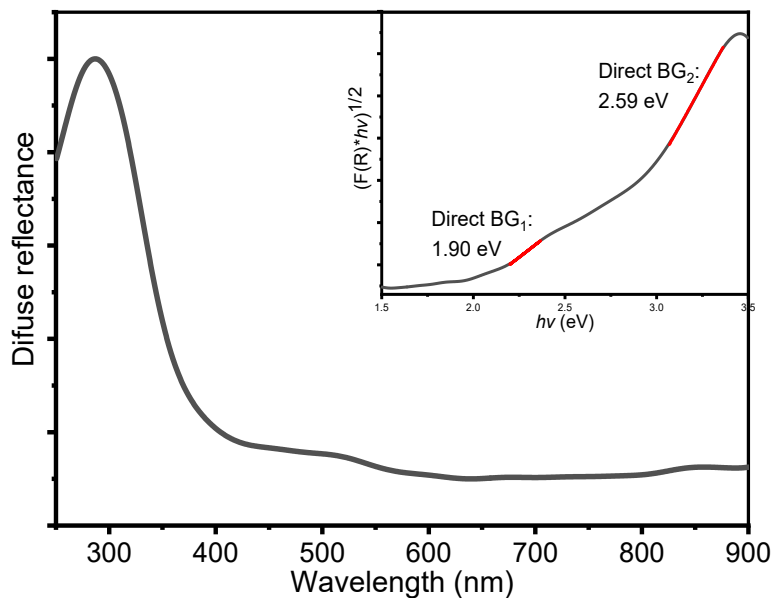

**Figure S.2.** Electronic adsorption spectroscopy in the UV-vis region, in reflectance mode, of a copper cobaltite sample. From this spectrum, the Kubelka-Munk graphic was calculated for direct band gaps (shown in inset). Two direct band gaps were calculated at 2.59 eV and 1.90 eV.

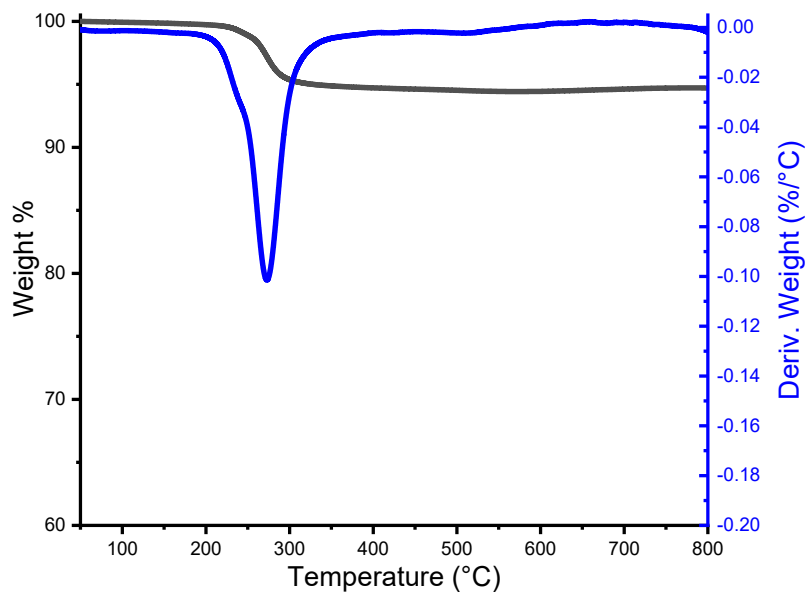

**Figure S.3.** Thermogram of a sample of copper cobaltite acquired under a 25 mL/min air flow from room temperature to 800 °C. A weight loss of 5.03% was detected in the 200°-334 °C range, perhaps due to some dehydration of surface hydroxyl groups formed during storage.

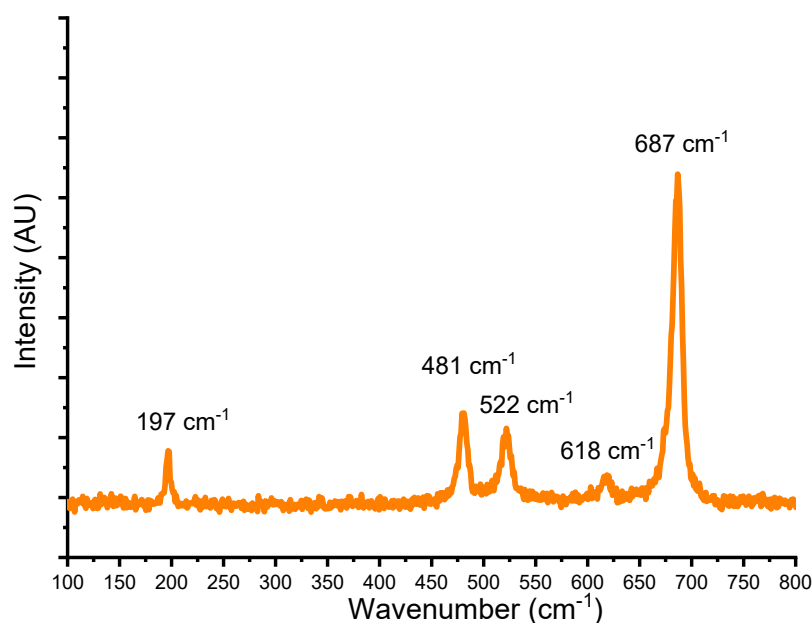

**Figure S.4.** Raman scattering spectroscopy analysis of a copper cobaltite sample. In the spectrum, five signals at 197  $\text{cm}^{-1}$ , 481  $\text{cm}^{-1}$ , 522  $\text{cm}^{-1}$ , 618  $\text{cm}^{-1}$ , and 687  $\text{cm}^{-1}$  were detected. According to literature, these bands may be assigned to  $F_{2g}$ ,  $E_g$ ,  $F_{2g}$ ,  $F_{2g}$ , and  $A_{1g}$  Raman-active modes from  $M\text{Co}_2\text{O}_4$  spinel structures [49], [50].

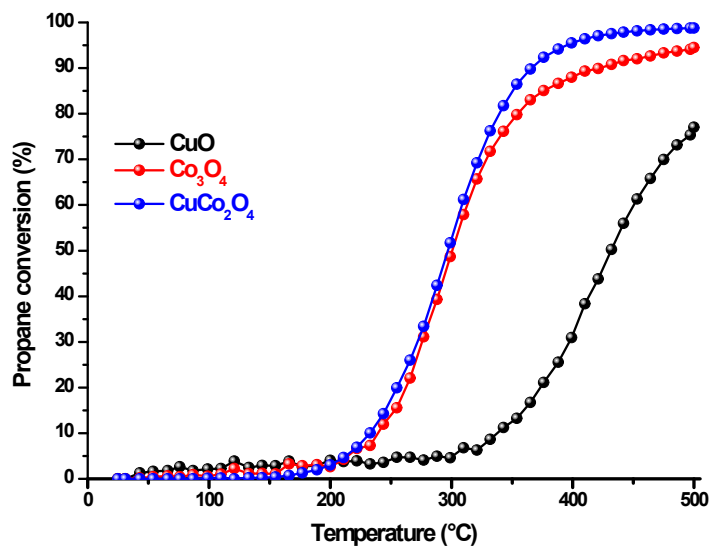

**Figure S.5.** Catalytic performance in the oxidation of propane was evaluated over a temperature range between 25 and 500  $^{\circ}\text{C}$ , employing 10 mg of CuO,  $\text{Co}_3\text{O}_4$  and  $\text{CuCo}_2\text{O}_4$  obtained by MW, with a heating rate of 2  $^{\circ}\text{C}/\text{min}$ .
